# Supplementary material
Source: PubMed Central journal article supplement (PMC4071139)
Supplement: NIHMS589953-supplement-Acknowledgment_Permission.pdf [file NIHMS589953-supplement-Acknowledgment_Permission.pdf]

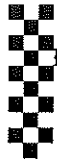

### Acknowledgment Permission Form

Journal Stroke  
 Manuscript No. 005304R1  
 First author Dr. Firas Al-All  
 Title of work The Capillary Index Score in the IMS I, II Trials.

#### Acknowledgment Permission:

Authors must provide written permission/approval from all individuals mentioned by name in the Acknowledgements section of a submitted manuscript. By signing this form, any and all acknowledged persons therefore state that they have read and approved the mention of their names in the Acknowledgment section of the aforementioned paper.

Printed Name Daneta E. Filipkowska  
 Signature [Handwritten Signature]  
 Date 4/23/14  
 Printed Name \_\_\_\_\_  
 Signature \_\_\_\_\_  
 Date \_\_\_\_\_  
 Printed Name \_\_\_\_\_  
 Signature \_\_\_\_\_  
 Date \_\_\_\_\_  
 Printed Name \_\_\_\_\_  
 Signature \_\_\_\_\_  
 Date \_\_\_\_\_
